# Supplementary material for: Controllable fabrication of TiO2 anatase/rutile phase junctions by a designer solvent for promoted photocatalytic performance
Source: Royal Society of Chemistry journal article supplement (doi:10.1039/d0cc04853d), 2020-01-01
Supplement: d0cc04853d1.pdf [file d0cc04853d1.pdf]

## Electronic Supplementary Information

# **Controllable fabrication of TiO<sub>2</sub> anatase/rutile phase junctions by a designer solvent for promoted photocatalytic activity**

Qian Wang,<sup>‡\*</sup> Xinxin Fang,<sup>‡</sup> Pin Hao, Huaiyan Ren, Yingqiang Zhao, Fang Huang,

Junfeng Xie, Guanwei Cui and Bo Tang\*

College of Chemistry, Chemical Engineering and Materials Science, Institute of Materials and Clean Energy, Collaborative Innovation Center of Functionalized Probes for Chemical Imaging in Universities of Shandong, Key Laboratory of Molecular and Nano Probes, Ministry of Education, Shandong Provincial Key Laboratory of Clean Production of Fine Chemicals, Shandong Normal University, Jinan 250014, P. R. China. E-mail: wangqian@sdnu.edu.cn; tangb@sdnu.edu.cn.

## 1. Experimental section

### 1.1 Materials and reagents.

Tetrabutyl titanate (TBOT  $\geq$  99% purity) was obtained by Shanghai Aladdin Biochemical Technology Co., Ltd, China. The commercial P25 TiO<sub>2</sub> was purchased from Beijing Entrepreneur Science & Trading Co., Ltd, China. choline chloride (ChCl), lactic acid, oxalic acid, absolute ethanol and methyl alcohol were supplied from Sinopharm Chemical Reagent Beijing Co., Ltd, China.

### 1.2 DES and TiO<sub>2</sub> Preparation

DESs were prepared by mixing two hydrogen-bond donors (lactic acid and oxalic acid) and hydrogen-bond acceptor (ChCl) with a molar ratio of donor to acceptor of 1:1 at 70 °C for 2-4 h until clear, transparent, homogeneous target liquids appeared. Moreover, the molar ratios of two hydrogen-bond donors of lactic acid to oxalic acid change from 6:1 to 1:10.

The TiO<sub>2</sub> was prepared as follows. First, 1 mL TBOT was added dropwise into the mixture solvent containing 15.5 mL ChCl/lactic acid/oxalic acid DES and 0.5 mL distilled water under vigorous stirring. Then the obtained mixture was poured into a 25 mL Teflon-lined stainless steel autoclave. The autoclave was put into an oven and heated at 180 °C for 18 h. After naturally cool down to the room temperature, the white precipitate was obtained via centrifugation, washing thoroughly with absolute ethanol and distilled water, and drying at 60 °C for 5 h.

### 1.3 Hydrogen evolution test

The photocatalytic H<sub>2</sub> evolution experiments were performed in a 20 mL quartz vessel sealed with a silicone rubber septum at an ambient temperature under atmospheric pressure. First, 1 mg as-prepared anatase/rutile junction TiO<sub>2</sub> was suspended in 10 mL double distilled water containing 20 vol% methanol as the sacrificial electron donor. Then, the sample solutions were thoroughly deaerated by bubbling nitrogen for 30 min. Next, each sample solution was irradiated by a 500 W mercury lamp (the light intensity was 0.020 W) at room temperature with continuous stirring. Finally, the evolved gases were analyzed by injecting 1 mL of headspace gas

into the gas chromatograph (FULI 9750, thermal conductivity detector, nitrogen as the carrier gas, 5A° molecular sieve column) and quantified using an external standard calibration plot.

#### *1.4 Photoelectrochemical measurements*

Photoelectrochemical performance measurements were carried out in a standard three-electrode PEC cell, with TiO<sub>2</sub>, saturated calomel electrode, and Pt wire as the working electrode, reference electrode, and counter electrode, respectively. A 0.5 M Na<sub>2</sub>SO<sub>4</sub> solution was used as the electrolyte and a 300W Xenon lamp was used as the light source. Electrochemical impedance spectroscopy (EIS) was carried out under 300 W Xenon lamp illumination at open circuit voltage over a frequency range of 0.1-100000 Hz with a bias voltage of 0.5 V.

#### *1.5 Characterizations of DESs and catalysts*

Fourier transform infrared (FT-IR) spectra were measured by Nicolet IS50 FT-IR spectrometer. The crystal structures of the samples were tested by X-ray diffraction (XRD, Bruker D8, Germany) equipped with Cu K $\alpha$  radiation. Raman spectra were carried out on a LabRAM HR800 confocal microscope Raman spectrometer. Scanning electron microscopy (SEM) images were detected on a Hitachi S4800 scanning electron microscope operating at 5.0 kV. Transmission Electron Microscopy (TEM) and High-Resolution Transmission Electron Microscopy (HRTEM) analyses were measured by JEM 2010 EX instrument. Photoluminescent (PL) spectra were obtained by an FLS-920 Edinburgh fluorescence spectrometer.

#### *1.6 Method of structure optimizations*

All the DFT calculations were operated using the Gaussian 09 program. The M062X/6-31+G (d,p) method has been used for structure optimizations. The subsequent frequency calculations at the same level verify the optimized structures to be at ground states without imaginary frequencies (NImag=0).

## **2. Optimized interactional structures of three compositions in DES**

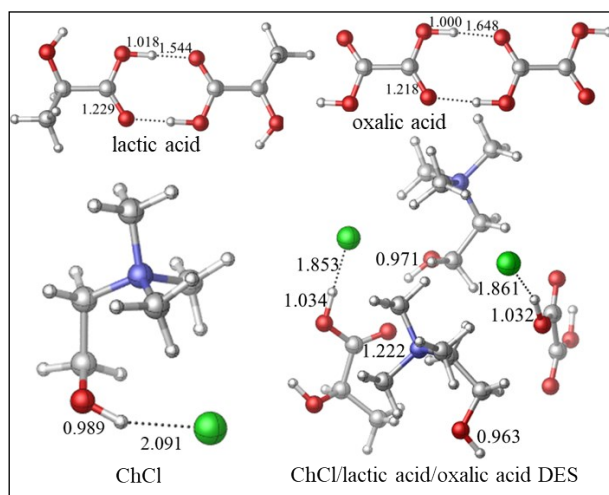

Fig. S1 The optimized interactional structures of three compositions in DES ChCl/lactic acid/oxalic acid by M062X/6-31+G (d,p). White: H; dark grey: C; blue: N; red: O; green: Cl.

### 3. HRTEM images of TiO<sub>2</sub> anatase/rutile phase junction (TiO<sub>2</sub>-AR)

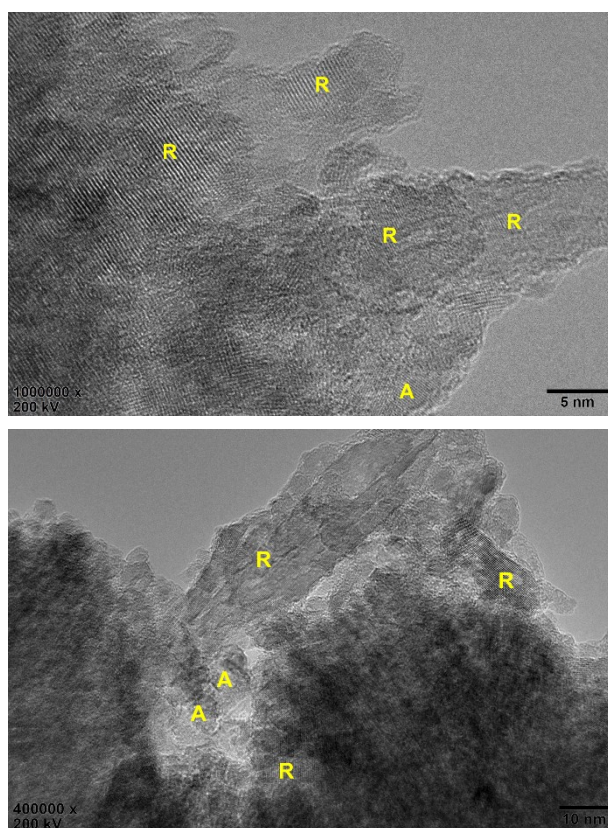

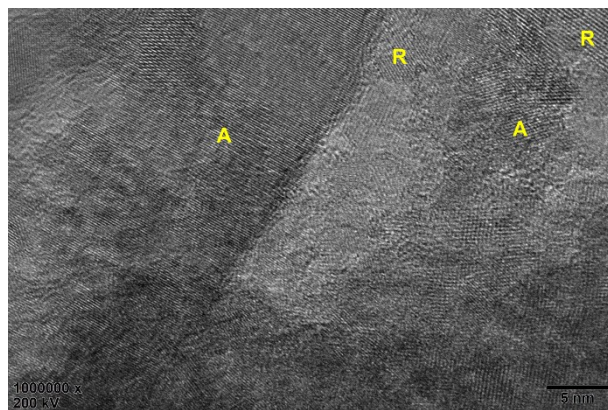

Fig. S2 HRTEM images for TiO<sub>2</sub>-AR sample at 1:4 of lactic to oxalic acid. A: anatase; R: rutile.

#### 4. XRD patterns of TiO<sub>2</sub>-AR sample before and after recycling test

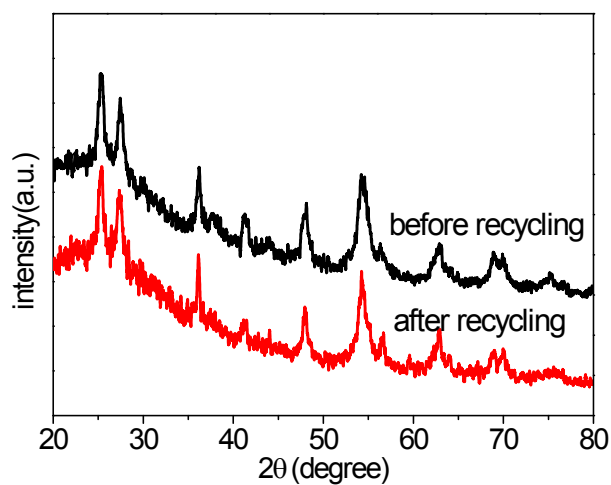

Fig. S3 XRD patterns of TiO<sub>2</sub>-AR sample before and after recycling test.
